# Supplementary material for: Factors Affecting Antidepressant Response Trajectories: A Veterans Affairs Augmentation and Switching Treatments for Improving Depression Outcomes Trial Report
Source: Atypon-hosted journal article supplement (doi:10.1176/appi.prcp.20230017), 2023-07-25
Supplement: rcp21073-sup-0001-suppl-data.pdf [file rcp21073-sup-0001-suppl-data.pdf]

## Supplements

### Supplement A: List of Performance Sites

**Location of Work:** CSP #576 was performed across 35 Veterans Affairs (VA) medical centers across the U.S., including: Atlanta VA Medical Center, Atlanta, Georgia; Bruce W. Carter VA Medical Center, Miami, Florida; Central Texas Veterans Healthcare System, Temple, Texas; Charles George VA Medical Center, Asheville, North Carolina; Cincinnati VA Medical Center, Cincinnati, Ohio; Clement J. Zablocki VA Medical Center, Milwaukee, Wisconsin; Edward Hines Jr VA Hospital, Hines, Illinois; James A Haley VA Hospital, Tampa, Florida; Kansas City VA Medical Center, Kansas City, Missouri; Long Beach VA Healthcare System, Long Beach, California; Louis A. Johnson VA Medical Center, Clarksburg, West Virginia; Louis Stokes VA Medical Center and Case Western Reserve University School of Medicine, Cleveland, Ohio; Memphis VA Medical Center, Memphis, Tennessee; Minneapolis VA Health Care System, Minneapolis, Minnesota; New Mexico VA Healthcare System, Albuquerque; Philadelphia VA Medical Center, Philadelphia, Pennsylvania; Phoenix VA Health Care System, Phoenix, Arizona; Richard L Roudebush VA Medical Center, Indianapolis, Indiana; Salem VA Medical Center, Salem, Virginia; San Francisco VA Health Care System, San Francisco, California; Southern Arizona VA Healthcare System, Tucson; Tuscaloosa VA Medical Center, Tuscaloosa, Alabama; University of California, San Diego; VA Eastern Colorado Healthcare System, Denver; VA Loma Linda Healthcare System, Loma Linda, California; VA Maryland Healthcare System, Baltimore; VA Nebraska Western Iowa Healthcare System, Omaha; VA New England Mental Illness Research, Education, and Clinical Center, VA Connecticut Healthcare System, West Haven; VA Palo Alto Healthcare System, Palo Alto, California; VA Pittsburgh Healthcare System, Pittsburgh, Pennsylvania; VA Puget Sound Health Care System, American Lake/Tacoma, Washington; VA San Diego Healthcare System, San Diego, California; Washington DC VA Medical Center; W.G. Hefner VA Medical Center, Salisbury, North Carolina; William S. Middleton Veterans Hospital, Madison, Wisconsin.

**Supplement B: Calculated Bayesian Information Criterion (BIC) and Bayes Factor Results for Addition of Successive Groups (Trajectories)**

|                       | <sup>a</sup> QIDS-C Analysis |                               | <sup>b</sup> PHQ-9 Analysis |                  |
|-----------------------|------------------------------|-------------------------------|-----------------------------|------------------|
| No. of groups         | <sup>c</sup> BIC             | <sup>d</sup> Log Bayes Factor | BIC                         | Log Bayes Factor |
| <b>1</b>              | -31774                       | NA                            | -33602                      | NA               |
| <b>2</b>              | -29840                       | 3867                          | -31516                      | 4170             |
| <b>3</b>              | -29235                       | 1211                          | -30794                      | 1444             |
| <b>4</b>              | -29033                       | 403                           | -30518                      | 552              |
| <b>5</b>              | -28975                       | 116                           | -30384                      | 268              |
| <sup>e</sup> <b>6</b> | -28933                       | 84                            | -30326                      | 116              |
| <sup>f</sup> <b>7</b> | NA                           | NA                            | NA                          | NA               |

<sup>a</sup>QIDS-C, Quick Inventory of Depressive Symptomatology–Clinician Rated. The QIDS-C score is calculated from a total of 16 clinician-administered questions, which map onto 9 psychiatric domains: sleep, mood, appetite, concentration, guilt, acute suicidal ideation, interest, fatigue, and psychomotor function. Each domain is scored on a scale of 0 to 3, with a score of 3 indicating greater severity. These scores are then summed to obtain a total QIDS-C score ranging from 0 to 27.

<sup>b</sup>PHQ-9, Patient Health Questionnaire – 9. Each of 9 questions is scored from 0 to 3, with 3 indicating greater severity. Possible scores on the PHQ-9 range from 0 to 27, with higher scores indicating greater degree of depression.

<sup>c</sup>Bayesian Information Criterion [BIC] =  $k \log(n) - 2\log(L(\theta))$ , where  $k$  is the number of parameters which the model estimates,  $n$  is the sample size, and  $L(\theta)$  represents the likelihood of the model tested.

<sup>d</sup>Log Bayes Factor =  $-2X$  (difference in BIC);  $> 10$  is preferred

<sup>e</sup>Chosen model

<sup>f</sup>The resulting group size is  $<5\%$  of sample – hence not used.

### Supplement C: Performance of the Trajectory Groups

| Trajectory No. | <sup>a</sup> QIDS-C Analysis |                  |                            |                       |                   | <sup>b</sup> PHQ-9 Analysis |       |                            |                       |        |
|----------------|------------------------------|------------------|----------------------------|-----------------------|-------------------|-----------------------------|-------|----------------------------|-----------------------|--------|
|                | <sup>c</sup> MPP             | <sup>d</sup> OCC | Group Proportion Estimates | 95% Confidence Limits | <sup>e</sup> DEAP | MPP                         | OCC   | Group Proportion Estimates | 95% Confidence Limits | DEAP   |
| 1              | 89%                          | 32.2             | 20%                        | 17 - 23               | 3.3%              | 85%                         | 75.3  | 7%                         | 4 - 9                 | 4.3%   |
| 2              | 84%                          | 11.9             | 31%                        | 27 - 35               | -1.3%             | 80%                         | 12.0  | 32%                        | 29 - 36               | 2.0%   |
| 3              | 73%                          | 51.8             | 25%                        | 20 - 30               | 22.5%             | 78%                         | 40.8  | 25%                        | 21 - 29               | 3.9%   |
| 4              | 75%                          | 8.7              | 5%                         | 2 - 8                 | -7.2%             | 88%                         | 15.6  | 8%                         | 5 - 11                | -5.5%  |
| 5              | 80%                          | 35.9             | 10%                        | 7 - 13                | 6.7%              | 87%                         | 26.8  | 20%                        | 17 - 23               | -3.2%  |
| 6              | 86%                          | 78.9             | 7%                         | 5 - 9                 | -3.0%             | 89%                         | 153.7 | 5%                         | 4 - 7                 | -14.3% |

<sup>a</sup>QIDS-C, Quick Inventory of Depressive Symptomatology–Clinician Rated. The QIDS-C score is calculated from a total of 16 clinician-administered questions, which map onto 9 psychiatric domains: sleep, mood, appetite, concentration, guilt, acute suicidal ideation, interest, fatigue, and psychomotor function. Each domain is scored on a scale of 0 to 3, with a score of 3 indicating greater severity. These scores are then added up to obtain a total QIDS-C score ranging from 0 to 27.

<sup>b</sup> PHQ-9, Patient Health Questionnaire – 9. Each of 9 questions is scored from 0 to 3, with 3 indicating greater severity. Possible scores on the PHQ-9 range from 0 to 27, with higher scores indicating greater degree of depression.

<sup>c</sup>MPP, mean posterior probability of group membership.

<sup>d</sup>OCC, odds of correct classification.

<sup>e</sup>DEAP, difference between estimated and the actual group proportion.

## Supplement D: Response Trajectories of the QIDS-C Clusters

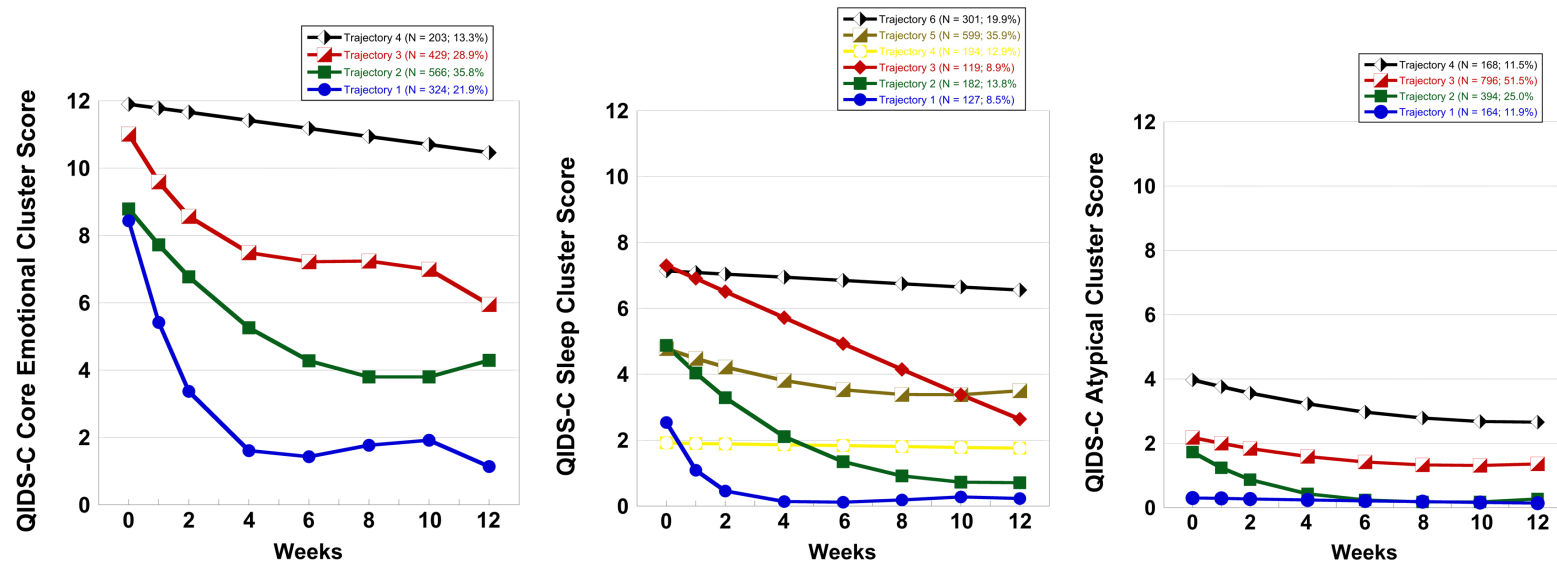

Response trajectories for each of the QIDS-C Clusters. Group-based trajectory modeling (GBTM) identified six trajectories in the QIDS-C sleep cluster, but only 4 trajectories of response were found for the core emotional and atypical clusters.

## Supplement E: Reasons for Withdrawal

| Reasons for Withdrawal: <sup>a</sup> QIDS-C |                                               |       |                        |      |                                                   |       |                          |       |                                         |       |                      |       |       |      |       |
|---------------------------------------------|-----------------------------------------------|-------|------------------------|------|---------------------------------------------------|-------|--------------------------|-------|-----------------------------------------|-------|----------------------|-------|-------|------|-------|
| Trajectory Group                            | Participant changed mind about being in study |       | Participant moved away |      | Lack of treatment response, worsening of symptoms |       | Drug related side effect |       | Participant not compliant with protocol |       | Due to other illness |       | Other |      | Total |
|                                             | N                                             | %     | N                      | %    | N                                                 | %     | N                        | %     | N                                       | %     | N                    | %     | N     | %    |       |
| <b>1</b>                                    | 22                                            | 2.5%  | 10                     | 1.1% | 8                                                 | 0.9%  | 25                       | 2.8%  | 21                                      | 2.3%  | 5                    | 0.6%  | 17    | 1.9% | 108   |
| <b>2</b>                                    | 35                                            | 3.9%  | 13                     | 1.5% | 67                                                | 7.5%  | 41                       | 4.6%  | 36                                      | 4.0%  | 8                    | 0.9%  | 21    | 2.3% | 221   |
| <b>3</b>                                    | 3                                             | 0.3%  | 2                      | 0.2% | 8                                                 | 0.9%  | 2                        | 0.2%  | 2                                       | 0.2%  | 0                    | 0.00% | 4     | 0.5% | 21    |
| <b>4</b>                                    | 37                                            | 4.1%  | 6                      | 0.7% | 134                                               | 14.9% | 58                       | 6.5%  | 39                                      | 4.3%  | 3                    | 0.3%  | 31    | 3.5% | 308   |
| <b>5</b>                                    | 1                                             | 0.1%  | 1                      | 0.1% | 118                                               | 13.2% | 2                        | 0.2%  | 2                                       | 0.2%  | 0                    | 0.0%  | 3     | 0.3% | 127   |
| <b>6</b>                                    | 2                                             | 0.2%  | 0                      | 0.0% | 80                                                | 8.9%  | 14                       | 1.6%  | 8                                       | 0.9%  | 2                    | 0.2%  | 6     | 0.7% | 112   |
| <b>Total</b>                                | 100                                           | 11.2% | 32                     | 3.6% | 415                                               | 46.3% | 142                      | 15.8% | 108                                     | 12.0% | 18                   | 2.0%  | 82    | 9.1% | 897   |
| Number of Completers = 625                  |                                               |       |                        |      |                                                   |       |                          |       |                                         |       |                      |       |       |      |       |

Chi square = 255, df = 30, p < 0.001

<sup>a</sup>QIDS-C, Quick Inventory of Depressive Symptomatology–Clinician Rated. The QIDS-C score is calculated from a total of 16 clinician-administered questions, which map onto 9 psychiatric domains: sleep, mood, appetite, concentration, guilt, acute suicidal ideation, interest, fatigue, and psychomotor function. Each domain is scored on a scale of 0 to 3, with a score of 3 indicating greater severity. These scores are then added up to obtain a total QIDS-C score ranging from 0 to 27.

| Reasons for Withdrawal: <sup>a</sup> PHQ-9 |                                               |       |                        |      |                                                   |       |                          |       |                                         |       |                      |      |       |      |       |
|--------------------------------------------|-----------------------------------------------|-------|------------------------|------|---------------------------------------------------|-------|--------------------------|-------|-----------------------------------------|-------|----------------------|------|-------|------|-------|
| Trajectory Group                           | Participant changed mind about being in study |       | Participant moved away |      | Lack of treatment response, worsening of symptoms |       | Drug related side effect |       | Participant not compliant with protocol |       | Due to other illness |      | Other |      | Total |
|                                            | N                                             | %     | N                      | %    | N                                                 | %     | N                        | %     | N                                       | %     | N                    | %    | N     | %    |       |
| <b>1</b>                                   | 9                                             | 1.0%  | 4                      | 0.5% | 1                                                 | 0.1%  | 7                        | 0.8%  | 4                                       | 0.5%  | 3                    | 0.3% | 6     | 0.7% | 34    |
| <b>2</b>                                   | 43                                            | 4.8%  | 12                     | 1.3% | 43                                                | 4.8%  | 56                       | 6.2%  | 45                                      | 5.0%  | 4                    | 0.5% | 24    | 2.7% | 227   |
| <b>3</b>                                   | 7                                             | 0.8%  | 3                      | 0.3% | 16                                                | 1.8%  | 9                        | 1.0%  | 9                                       | 1.0%  | 2                    | 0.2% | 6     | 0.7% | 52    |
| <b>4</b>                                   | 24                                            | 2.7%  | 9                      | 1.0% | 137                                               | 15.3% | 29                       | 3.2%  | 23                                      | 2.6%  | 4                    | 0.5% | 24    | 2.7% | 250   |
| <b>5</b>                                   | 16                                            | 1.8%  | 4                      | 0.5% | 156                                               | 17.4% | 30                       | 3.3%  | 24                                      | 2.7%  | 5                    | 0.6% | 18    | 2.0% | 253   |
| <b>6</b>                                   | 1                                             | 0.1%  | 0                      | 0.0% | 62                                                | 6.9%  | 11                       | 1.2%  | 3                                       | 0.3%  | 0                    | 0.0% | 4     | 0.5% | 81    |
| <b>Total</b>                               | 100                                           | 11.2% | 32                     | 3.6% | 415                                               | 46.3% | 142                      | 15.8% | 108                                     | 12.0% | 18                   | 2.0% | 82    | 9.1% | 897   |
| Number of Completers = 625                 |                                               |       |                        |      |                                                   |       |                          |       |                                         |       |                      |      |       |      |       |

Chi square = 188, df = 30, p < 0.001

<sup>a</sup>PHQ-9, Patient Health Questionnaire – 9. Each of 9 questions is scored from 0 to 3, with 3 indicating greater severity. Possible scores on the PHQ-9 range from 0 to 27, with higher scores indicating greater degree of depression.

**Supplement F: Comparisons of Demographic and Clinical Characteristics among Trajectory Groups of VAST-D Participants by Trajectory Group**

**Table 1a. Comparisons of Demographic Characteristics and Clinical Characteristics of VAST-D Participants by Trajectory Group for the <sup>a</sup>QIDS-C Total Score**

| Trajectory                     |     |      |     |       |    |      |     |       |    |      |    |      |            |         |
|--------------------------------|-----|------|-----|-------|----|------|-----|-------|----|------|----|------|------------|---------|
| Demographic Features           | 1   |      | 2   |       | 3  |      | 4   |       | 5  |      | 6  |      | Chi Square | P Value |
|                                | N   | %    | N   | %     | N  | %    | N   | %     | N  | %    | N  | %    |            |         |
| <sup>b</sup> Education         |     |      |     |       |    |      |     |       |    |      |    |      | 14.8       | 0.46    |
| Some college                   | 107 | 7.0% | 197 | 12.9% | 24 | 1.6% | 155 | 10.2% | 55 | 3.6% | 48 | 3.2% |            |         |
| High school or Less            | 92  | 6.0% | 125 | 8.2%  | 11 | 0.7% | 125 | 8.2%  | 40 | 2.6% | 36 | 2.4% |            |         |
| Associate Degree               | 37  | 2.4% | 76  | 5.0%  | 10 | 0.7% | 48  | 3.2%  | 18 | 1.2% | 12 | 0.8% |            |         |
| Bachelors Degree or Higher     | 61  | 4.0% | 87  | 5.7%  | 17 | 1.1% | 90  | 5.9%  | 31 | 2.0% | 20 | 1.3% |            |         |
| <sup>c</sup> Employment Status |     |      |     |       |    |      |     |       |    |      |    |      | 36.5       | <0.001  |
| Employed                       | 96  | 6.3% | 132 | 8.7%  | 16 | 1.1% | 91  | 6.0%  | 31 | 2.0  | 21 | 1.4% |            |         |
| Retired (and not working)      | 100 | 6.6% | 167 | 11.0% | 19 | 1.2% | 120 | 7.9%  | 35 | 2.3% | 33 | 2.2% |            |         |

|                                                         |     |       |     |       |    |      |     |       |     |      |     |      |      |        |
|---------------------------------------------------------|-----|-------|-----|-------|----|------|-----|-------|-----|------|-----|------|------|--------|
| Unemployed<br>(includes<br>disability or<br>assistance) | 99  | 6.5%  | 184 | 12.1% | 27 | 1.8% | 207 | 13.6% | 77  | 5.1% | 60  | 3.9% |      |        |
| <b><sup>d</sup>Gender</b>                               |     |       |     |       |    |      |     |       |     |      |     |      | 10.9 | 0.05   |
| Male                                                    | 254 | 16.7% | 398 | 26.1% | 49 | 3.2% | 361 | 23.7% | 130 | 8.5% | 104 | 6.8% |      |        |
| Female                                                  | 43  | 2.8%  | 87  | 5.7%  | 13 | 0.9% | 57  | 3.7%  | 14  | 0.9  | 12  | 0.8% |      |        |
| <b><sup>e</sup>Grief<br/>Endorsement</b>                |     |       |     |       |    |      |     |       |     |      |     |      | 18.6 | <0.001 |
| <=3                                                     | 143 | 9.4%  | 213 | 14.0% | 26 | 1.7% | 155 | 10.2% | 52  | 3.4% | 34  | 2.2% |      |        |
| >3                                                      | 154 | 10.1% | 272 | 17.9% | 36 | 2.4% | 263 | 17.3% | 92  | 6.0% | 82  | 5.4% |      |        |
| <b><sup>f</sup>Marital<br/>Status</b>                   |     |       |     |       |    |      |     |       |     |      |     |      | 1.78 | 0.87   |
| Single                                                  | 165 | 10.8% | 265 | 17.4% | 38 | 2.5% | 228 | 15.0% | 75  | 4.9% | 61  | 4.0% |      |        |
| Married or<br>Cohabiting                                | 132 | 8.7%  | 220 | 14.5% | 24 | 1.6% | 190 | 12.5% | 69  | 4.5% | 55  | 3.6% |      |        |
| <b><sup>g</sup>Race</b>                                 |     |       |     |       |    |      |     |       |     |      |     |      | 23.6 | 0.01   |
| White                                                   | 203 | 13.3% | 341 | 22.4% | 49 | 3.2% | 274 | 18.0% | 84  | 5.5% | 66  | 4.3% |      |        |
| African-<br>America or<br>Black                         | 71  | 4.7%  | 112 | 7.4%  | 7  | 0.5% | 101 | 6.6%  | 39  | 2.6% | 37  | 2.4% |      |        |
| Other                                                   | 23  | 1.5%  | 32  | 2.1%  | 6  | 0.4% | 43  | 2.8%  | 21  | 1.4% | 13  | 0.9% |      |        |



|                                               |     |       |     |       |    |      |     |       |     |      |     |      |      |        |
|-----------------------------------------------|-----|-------|-----|-------|----|------|-----|-------|-----|------|-----|------|------|--------|
| <b><sup>h</sup>Substance or Alcohol Abuse</b> |     |       |     |       |    |      |     |       |     |      |     |      | 4.7  | 0.45   |
| No                                            | 260 | 17.1% | 427 | 28.1% | 56 | 3.7% | 360 | 23.7% | 118 | 7.8% | 102 | 6.7% |      |        |
| Yes                                           | 37  | 2.4%  | 58  | 3.8%  | 6  | 0.4% | 58  | 3.8%  | 26  | 1.7% | 14  | 0.9% |      |        |
| <b><sup>i</sup>Treatment Allocation</b>       |     |       |     |       |    |      |     |       |     |      |     |      | 32.5 | <0.001 |
| Aug-ARI                                       | 115 | 7.6%  | 176 | 11.6% | 29 | 1.9% | 100 | 6.6%  | 49  | 3.2% | 36  | 2.4% |      |        |
| Aug-BUP                                       | 100 | 6.6%  | 157 | 10.3% | 13 | 0.9% | 148 | 9.7%  | 47  | 3.1% | 41  | 2.7% |      |        |
| Switch-BUP                                    | 82  | 5.4%  | 152 | 10.0% | 20 | 1.3% | 170 | 11.2% | 48  | 3.2% | 39  | 2.6% |      |        |

| <b>Clinical Characteristic</b>               | <b>X</b> | <b>SD</b> | <b>F Statistic</b> | <b>P Value</b> |
|----------------------------------------------|----------|-----------|----------|-----------|----------|-----------|----------|-----------|----------|-----------|----------|-----------|--------------------|----------------|
| <b><sup>j</sup>ACES</b>                      | 2.9      | 2.37      | 3.1      | 2.51      | 3.7      | 2.64      | 3.2      | 2.48      | 3.4      | 2.81      | 3.2      | 2.77      | 1.61               | 0.15           |
| <b><sup>k</sup>Age</b>                       | 55.4     | 12.4      | 54.8     | 12.3      | 52.7     | 11.7      | 53.7     | 12.7      | 53.7     | 11.6      | 54.3     | 10.7      | 1.18               | 0.32           |
| <b><sup>l</sup>BAI</b>                       | 0.7      | 0.47      | 0.82     | 0.48      | 1.3      | 0.55      | 0.97     | 0.53      | 1.1      | 0.57      | 1.2      | 0.58      | 33.5               | <0.001         |
| <b><sup>m</sup>CIRS Severity Index</b>       | 1.8      | 0.38      | 1.8      | 0.38      | 1.8      | 0.37      | 1.8      | 0.37      | 1.8      | 0.31      | 1.8      | 0.35      | 0.18               | 0.97           |
| <b><sup>n</sup>DSM-5 Mixed Features</b>      | 11.7     | 2.76      | 11.4     | 2.45      | 11.6     | 2.57      | 11.8     | 2.69      | 12.1     | 2.64      | 11.8     | 2.56      | 2.13               | 0.06           |
| <b><sup>o</sup>Duration of Index Episode</b> | 68.3     | 113       | 82.6     | 129       | 102      | 147       | 80.7     | 124       | 120      | 151       | 128      | 169       | 5.66               | <0.001         |

|                                               |      |      |      |      |      |      |      |      |      |      |      |      |      |        |
|-----------------------------------------------|------|------|------|------|------|------|------|------|------|------|------|------|------|--------|
| <b><sup>p</sup>Lifetime Suicidal Ideation</b> | 2.2  | 2.02 | 2.2  | 1.97 | 3.1  | 1.89 | 2.3  | 1.94 | 2.3  | 1.89 | 2.5  | 1.97 | 2.94 | 0.012  |
| <b>QIDS-C</b>                                 | 14.6 | 2.73 | 15.9 | 2.90 | 20.8 | 2.15 | 16.9 | 2.81 | 18.2 | 2.57 | 20.7 | 2.13 | 130  | <0.001 |
| <b><sup>q</sup>Q-LES-Q-SF</b>                 | 48.6 | 14.2 | 43.5 | 12.8 | 30.2 | 12.9 | 38.1 | 13.2 | 35.5 | 13.8 | 29.4 | 12.8 | 57.7 | <0.001 |

<sup>a</sup>QIDS-C, Quick Inventory of Depressive Symptomatology–Clinician Rated, at baseline. The QIDS-C score is calculated from a total of 16 clinician-administered questions, which map onto 9 psychiatric domains: sleep, mood, appetite, concentration, guilt, acute suicidal ideation, interest, fatigue, and psychomotor function. Each domain is scored on a scale of 0 to 3, with a score of 3 indicating greater severity. These scores are then added up to obtain a total QIDS-C score ranging from 0 to 27.

<sup>b</sup>Education, at baseline. The level of educational attainment by the following categories: high school or less, some college, associate degree, bachelor degree, or higher.

<sup>c</sup>Employment Status, at baseline. The employment status by the following categories: unemployed (includes disability or assistance), retired (and not working), or employed.

<sup>d</sup>Gender. Male or female gender, as declared by the participant.

<sup>e</sup>Grief Endorsement, at baseline. Endorsement of  $\leq 3$  versus  $> 3$  items on the Complicated Grief Questionnaire, with endorsement of more items indicating greater complicated grief.

<sup>f</sup>Marital Status, at baseline. Identification of status as single vs. married/cohabiting.

<sup>g</sup>Race. The declared race of the participant in the following categories: white, African-American/black, or other.

<sup>h</sup>Substance or Alcohol Abuse, at baseline. The presence of a substance or alcohol abuse diagnosis by the M.I.N.I.

<sup>i</sup>Treatment Allocation. Allocation to one of three treatment groups: Aug-ARI, Aug-BUP, or Switch-BUP.

<sup>j</sup>ACES, Adverse Childhood Experiences Survey, at baseline. Possible scores range from 0 to 10, with higher scores indicating greater childhood adversity and greater risk of psychological or health problems.

<sup>k</sup>Age, in years, at baseline.

<sup>l</sup>BAI, Beck Anxiety Inventory, at baseline. Possible scores range from 0 to 3 (average rating of each of the 21 items), with higher scores indicating greater anxiety.

<sup>m</sup>CIRS Severity Index, Cumulative Illness Rating Scale Comorbidity Severity Index, at baseline. Possible scores range from 0 to 4, with higher scores indicating greater severity of co-occurring medical conditions.

<sup>n</sup>DSM-5 Mixed Features, presence of mixed features by a self-rated 9-item mixed features scale based on the DSM-5, at baseline. Possible scores range from 0 to 18, with higher scores indicating more hypomanic or manic symptoms.

<sup>o</sup>Duration of Index Episode, duration in months of the depression episode that is currently being treated, at baseline.

<sup>p</sup>Lifetime Suicidal Ideation, Columbia Suicide Severity Rating Scale-Lifetime Suicidal Ideation, at baseline. Possible scores range from 0 to 5, with higher scores indicating greater suicidal ideation or intent.

<sup>q</sup>Q-LES-Q-SF, Quality of Life Enjoyment and Satisfaction Questionnaire-Short Form, at baseline. Possible scores range from 0 to 100% of the maximum scale score of 70, with higher scores indicating greater life satisfaction and enjoyment.

**Table 1b. Comparisons of Demographic and Clinical Characteristics Indicators of VAST-D Participants by Trajectory Group for the <sup>a</sup>QIDS-C Core Emotional Cluster**

| Demographic Features                        | Trajectory |      |     |      |     |      |    |      | Chi Square | P value |
|---------------------------------------------|------------|------|-----|------|-----|------|----|------|------------|---------|
|                                             | 1          |      | 2   |      | 3   |      | 4  |      |            |         |
|                                             | N          | %    | N   | %    | N   | %    | N  | %    |            |         |
| <sup>b</sup> Education                      |            |      |     |      |     |      |    |      | 7.72       | 0.56    |
| Some College                                | 127        | 8.3% | 209 | 14%  | 167 | 11%  | 83 | 5.5% |            |         |
| High School or Less Than High School Degree | 99         | 6.5% | 150 | 9.9% | 128 | 8.4% | 52 | 3.4% |            |         |
| Associate degree                            | 39         | 2.6% | 88  | 5.8% | 48  | 3.2% | 26 | 1.7% |            |         |
| Bachelor's degree or higher                 | 59         | 3.9% | 119 | 7.8% | 86  | 5.7% | 42 | 2.8% |            |         |
| <sup>c</sup> Employment Status              |            |      |     |      |     |      |    |      | 30.5       | <0.001  |
| Employed                                    | 100        | 6.6% | 150 | 9.9% | 99  | 6.5% | 38 | 2.5% |            |         |
| Retired (and not working)                   | 106        | 7.0% | 197 | 13%  | 115 | 7.6% | 56 | 3.7% |            |         |

|                                                            |     |       |     |       |     |       |     |       |      |        |
|------------------------------------------------------------|-----|-------|-----|-------|-----|-------|-----|-------|------|--------|
| Unemployed<br>(includes those on disability or assistance) | 117 | 7.7%  | 216 | 14%   | 214 | 14%   | 107 | 7.0%  |      |        |
| <b><sup>d</sup>Gender</b>                                  |     |       |     |       |     |       |     |       | 4.77 | 0.19   |
| Male                                                       | 275 | 18.1% | 469 | 30.8% | 375 | 24.6% | 177 | 11.6% |      |        |
| Female                                                     | 49  | 3.2%  | 97  | 6.4%  | 54  | 3.5%  | 26  | 1.7%  |      |        |
| <b><sup>e</sup>Grief Endorsement</b>                       |     |       |     |       |     |       |     |       | 22.8 | <0.001 |
| <=3                                                        | 165 | 10.8% | 235 | 15.4% | 157 | 10.3% | 66  | 4.3%  |      |        |
| >3                                                         | 159 | 10.4% | 331 | 21.7% | 272 | 17.8% | 137 | 9.0%  |      |        |
| <b><sup>f</sup>Marital Status</b>                          |     |       |     |       |     |       |     |       | 1.50 | 0.59   |
| Single                                                     | 183 | 12.0% | 300 | 19.7% | 242 | 15.9% | 107 | 7.0%  |      |        |
| Marriage or Cohabitation                                   | 141 | 9.3%  | 266 | 17.5% | 187 | 12.3% | 96  | 6.3%  |      |        |
| <b><sup>g</sup>Race</b>                                    |     |       |     |       |     |       |     |       | 7.72 | 0.56   |
| Some College                                               | 127 | 8.3%  | 209 | 13.7% | 167 | 10.9% | 83  | 5.5%  |      |        |
| High School Diploma or Less                                | 99  | 6.5%  | 150 | 9.9%  | 128 | 8.4%  | 52  | 3.4%  |      |        |

|                                               |     |       |     |       |     |       |     |       |      |      |
|-----------------------------------------------|-----|-------|-----|-------|-----|-------|-----|-------|------|------|
| Associate Degree                              | 39  | 2.6%  | 88  | 5.8%  | 48  | 3.2%  | 26  | 1.7%  |      |      |
| Bachelor's Degree or higher                   | 59  | 3.9%  | 119 | 7.8%  | 86  | 5.7%  | 42  | 2.8%  |      |      |
| <b><sup>h</sup>Substance or Alcohol Abuse</b> |     |       |     |       |     |       |     |       | 0.67 | 0.88 |
| No                                            | 284 | 18.6% | 490 | 32.2% | 370 | 24.3% | 179 | 11.6% |      |      |
| Yes                                           | 40  | 2.6%  | 76  | 4.9%  | 59  | 3.9%  | 24  | 1.6%  |      |      |
| <b><sup>i</sup>Treatment Allocation</b>       |     |       |     |       |     |       |     |       | 16.5 | 0.01 |
| Aug-ARI                                       | 134 | 8.8   | 185 | 12.2% | 119 | 7.8%  | 67  | 4.4%  |      |      |
| Aug-BUP                                       | 100 | 6.6%  | 186 | 12.2% | 151 | 9.9%  | 69  | 4.5%  |      |      |
| Switch-BUP                                    | 90  | 5.9%  | 195 | 12.8% | 159 | 10.4% | 67  | 4.4%  |      |      |

| <b>Clinical Characteristic</b>                 | <b>X</b> | <b>SD</b> | <b>X</b> | <b>SD</b> | <b>X</b> | <b>SD</b> | <b>X</b> | <b>SD</b> | <b>F Statistic</b> | <b>P value</b> |
|------------------------------------------------|----------|-----------|----------|-----------|----------|-----------|----------|-----------|--------------------|----------------|
| <sup>j</sup> <b>ACE</b>                        | 3.04     | 2.48      | 3.03     | 2.51      | 3.29     | 2.51      | 3.25     | 2.75      | 1.20               | 0.31           |
| <sup>k</sup> <b>Age</b>                        | 55.2     | 12.4      | 54.8     | 12.6      | 53.5     | 11.9      | 53.8     | 11.5      | 1.64               | 0.18           |
| <sup>l</sup> <b>BAI</b>                        | 0.72     | 0.48      | 0.85     | 0.50      | 1.01     | 0.55      | 1.17     | 0.57      | 40.3               | <0.001         |
| <sup>m</sup> <b>CIRS Severity</b>              | 1.81     | 0.37      | 1.83     | 0.39      | 1.85     | 0.35      | 1.80     | 0.35      | 1.09               | 0.35           |
| <sup>n</sup> <b>DSM-5 Mixed Features</b>       | 11.6     | 2.85      | 11.6     | 2.56      | 11.8     | 2.59      | 11.6     | 2.43      | 0.36               | 0.79           |
| <sup>o</sup> <b>Duration of Index Episode</b>  | 68.0     | 112       | 82.1     | 129       | 97.1     | 139       | 110      | 150       | 5.35               | <0.01          |
| <sup>p</sup> <b>Lifetime Suicidal Ideation</b> | 2.26     | 2.04      | 2.21     | 2.00      | 2.43     | 1.92      | 2.18     | 1.90      | 1.14               | 0.33           |
| <sup>q</sup> <b>QIDS-C</b>                     | 14.9     | 2.86      | 15.8     | 2.93      | 17.9     | 2.93      | 19.4     | 2.69      | 141                | <0.001         |
| <sup>r</sup> <b>Q-LES-Q-SF</b>                 | 48.1     | 14.0      | 43.1     | 13.2      | 36.3     | 12.8      | 31.1     | 13.9      | 89.5               | <0.001         |

<sup>a</sup>QIDS-C, Quick Inventory of Depressive Symptomatology –Clinician Rated Core Emotional Cluster. Possible scores are based upon a sum of QIDS-C scores for the 5 following items: energy/fatigability, concentration/decision making, loss of interest, mood, and feelings of worthlessness. Each item is rated on a scale from 0 to 3, with 3 representing greater severity. Scores range from 0 to 15, with higher scores indicating greater severity of symptoms.

<sup>b</sup>Education, at baseline. The level of educational attainment by the following categories: high school or less, some college, associate degree, bachelor degree, or higher.

<sup>c</sup>Employment Status, at baseline. The employment status by the following categories: unemployed (includes disability or assistance), retired (and not working), or employed.

<sup>d</sup>Gender. Male or female gender, as declared by the participant.

<sup>e</sup>Grief Endorsement, at baseline. Endorsement of  $\leq 3$  versus  $>3$  items on the Complicated Grief Questionnaire, with endorsement of more items indicating greater complicated grief.

<sup>f</sup>Marital Status, at baseline. Identification of status as single vs. married/cohabiting.

<sup>g</sup>Race. The declared race of the participant in the following categories: white, African-American/black, or other.

<sup>h</sup>Substance or Alcohol Abuse, at baseline. The presence of a substance or alcohol abuse diagnosis by the M.I.N.I.

<sup>i</sup>Treatment Allocation. Allocation to one of three treatment groups: Aug-ARI, Aug-BUP, or Switch-BUP.

<sup>j</sup>ACES, Adverse Childhood Experiences Survey, at baseline. Possible scores range from 0 to 10, with higher scores indicating greater childhood adversity and greater risk of psychological or health problems.

<sup>k</sup>Age, in years, at baseline.

<sup>l</sup>BAI, Beck Anxiety Inventory, at baseline. Possible scores range from 0 to 3 (average rating of each of the 21 items), with higher scores indicating greater anxiety.

<sup>m</sup>CIRS Severity Index, Cumulative Illness Rating Scale Comorbidity Severity Index, at baseline. Possible scores range from 0 to 4, with higher scores indicating greater severity of co-occurring medical conditions.

<sup>n</sup>DSM-5 Mixed Features, presence of mixed features by a self-rated 9-item mixed features scale based on the DSM-5, at baseline. Possible scores range from 0 to 18, with higher scores indicating more hypomanic or manic symptoms.

<sup>o</sup>Duration of Index Episode, duration in months of the depression episode that is currently being treated, at baseline.

<sup>p</sup>Lifetime Suicidal Ideation, Columbia Suicide Severity Rating Scale-Lifetime Suicidal Ideation, at baseline. Possible scores range from 0 to 5, with higher scores indicating greater suicidal ideation or intent.

<sup>q</sup>QIDS-C, Quick Inventory of Depressive Symptomatology–Clinician Rated, at baseline. The QIDS-C score is calculated from a total of 16 clinician-administered questions, which map onto 9 psychiatric domains: sleep, mood, appetite,



concentration, guilt, acute suicidal ideation, interest, fatigue, and psychomotor function. Each domain is scored on a scale of 0 to 3, with a score of 3 indicating greater severity. These scores are then added up to obtain a total QIDS-C score ranging from 0 to 27.

Q-LES-Q-SF, Quality of Life Enjoyment and Satisfaction Questionnaire-Short Form, at baseline. Possible scores range from 0 to 100% of the maximum scale score of 70, with higher scores indicating greater life satisfaction and enjoyment.

**Table 1c. Comparisons of Demographic and Clinical Characteristics of VAST-D Participants by Trajectory Group for the <sup>a</sup>QIDS-C Sleep Cluster**

| Trajectory                                  |    |      |    |      |    |      |    |      |     |       |     |       |            |         |
|---------------------------------------------|----|------|----|------|----|------|----|------|-----|-------|-----|-------|------------|---------|
| Demographic Features                        | 1  |      | 2  |      | 3  |      | 4  |      | 5   |       | 6   |       | Chi Square | P Value |
|                                             | N  | %    | N  | %    | N  | %    | N  | %    | N   | %     | N   | %     |            |         |
| <sup>b</sup> Education                      |    |      |    |      |    |      |    |      |     |       |     |       | 22.8       | 0.09    |
| Some college                                | 45 | 3.0% | 79 | 5.2% | 67 | 4.4% | 44 | 2.9% | 226 | 14.8% | 125 | 8.2%  |            |         |
| High school or less than high school degree | 32 | 2.1% | 43 | 2.8% | 44 | 2.9% | 39 | 2.6% | 179 | 11.8% | 92  | 6.0%  |            |         |
| Associate degree                            | 16 | 1.1% | 24 | 1.6% | 34 | 2.2% | 11 | 0.7% | 77  | 5.1%  | 39  | 2.6%  |            |         |
| Bachelors degree or higher                  | 34 | 2.2% | 36 | 2.4% | 49 | 3.2% | 25 | 1.6% | 117 | 7.7%  | 45  | 3.0%  |            |         |
| <sup>c</sup> Employment Status              |    |      |    |      |    |      |    |      |     |       |     |       | 31.2       | <0.001  |
| Employed                                    | 44 | 2.9% | 52 | 3.4% | 65 | 4.3% | 25 | 1.6% | 146 | 9.6%  | 55  | 3.6%  |            |         |
| Retired (and not working)                   | 38 | 2.5% | 58 | 3.8% | 61 | 4.0% | 38 | 2.5% | 193 | 12.6% | 86  | 5.7%  |            |         |
| Unemployed (includes                        | 45 | 3.0% | 72 | 4.7% | 66 | 4.3% | 56 | 3.7% | 256 | 16.8% | 159 | 10.4% |            |         |

|                                      |     |      |     |      |     |       |    |      |     |       |     |       |      |        |
|--------------------------------------|-----|------|-----|------|-----|-------|----|------|-----|-------|-----|-------|------|--------|
| those on disability or assistance)   |     |      |     |      |     |       |    |      |     |       |     |       |      |        |
| <b><sup>d</sup>Gender</b>            |     |      |     |      |     |       |    |      |     |       |     |       | 12.6 | 0.03   |
| Male                                 | 106 | 7.0% | 145 | 9.5% | 162 | 10.6% | 95 | 6.2% | 529 | 34.8% | 259 | 17.0% |      |        |
| Female                               | 21  | 1.4% | 37  | 2.4% | 32  | 2.1%  | 24 | 1.6% | 70  | 4.6%  | 42  | 2.8%  |      |        |
| <b><sup>e</sup>Grief Endorsement</b> |     |      |     |      |     |       |    |      |     |       |     |       | 27.3 | <0.001 |
| <=3                                  | 62  | 4.1% | 78  | 5.1% | 100 | 6.6%  | 35 | 2.3% | 249 | 16.3% | 99  | 6.5%  |      |        |
| >3                                   | 65  | 4.3% | 104 | 6.8% | 94  | 6.2%  | 84 | 5.5% | 350 | 22.9% | 202 | 13.3% |      |        |
| <b><sup>f</sup>Marital status</b>    |     |      |     |      |     |       |    |      |     |       |     |       | 11.4 | 0.04   |
| Single                               | 66  | 4.3% | 101 | 6.6% | 98  | 6.4%  | 81 | 5.3% | 317 | 20.8% | 169 | 11.1% |      |        |
| Married or Cohabiting                | 61  | 4.0% | 81  | 5.3% | 96  | 6.3%  | 38 | 2.5% | 282 | 18.5% | 132 | 8.7%  |      |        |
| <b><sup>g</sup>Race</b>              |     |      |     |      |     |       |    |      |     |       |     |       | 49.3 | <0.001 |
| White                                | 91  | 6.0% | 120 | 7.9% | 149 | 9.8%  | 67 | 4.4% | 430 | 28.2% | 160 | 10.5% |      |        |
| African-American or Black            | 28  | 1.8% | 44  | 2.9% | 35  | 2.3%  | 37 | 2.4% | 120 | 7.9%  | 103 | 6.8%  |      |        |
| Other                                | 8   | 0.5% | 18  | 1.2% | 10  | 0.7%  | 15 | 1.0% | 49  | 3.2%  | 38  | 2.5%  |      |        |

|                                               |     |      |     |       |     |       |     |      |     |       |     |       |     |      |
|-----------------------------------------------|-----|------|-----|-------|-----|-------|-----|------|-----|-------|-----|-------|-----|------|
| <b><sup>h</sup>Substance or Alcohol Abuse</b> |     |      |     |       |     |       |     |      |     |       |     |       | 2.1 | 0.84 |
| No                                            | 113 | 7.4% | 158 | 10.4% | 169 | 11.1% | 107 | 7.0% | 519 | 34.1% | 257 | 16.8% |     |      |
| Yes                                           | 14  | 0.9% | 24  | 1.6%  | 25  | 1.6%  | 12  | 0.8% | 80  | 5.3%  | 44  | 2.9%  |     |      |
| <b><sup>i</sup>Treatment Allocation</b>       |     |      |     |       |     |       |     |      |     |       |     |       | 8.3 | 0.60 |
| Aug-ARI                                       | 46  | 3.0% | 68  | 4.5%  | 64  | 4.2%  | 46  | 3.0% | 184 | 12.1% | 97  | 6.4%  |     |      |
| Aug-BUP                                       | 42  | 2.8% | 59  | 3.9%  | 71  | 4.7%  | 36  | 2.4% | 205 | 13.5% | 93  | 6.1%  |     |      |
| Switch-BUP                                    | 39  | 2.6% | 55  | 3.6%  | 59  | 3.9%  | 37  | 2.4% | 210 | 13.8% | 111 | 7.3%  |     |      |

| <b>Clinical Characteristic</b>          | <b>X</b> | <b>SD</b> | <b>F Statistic</b> | <b>P Value</b> |
|-----------------------------------------|----------|-----------|----------|-----------|----------|-----------|----------|-----------|----------|-----------|----------|-----------|--------------------|----------------|
| <b><sup>j</sup>ACES</b>                 | 2.9      | 2.37      | 3.1      | 2.51      | 3.7      | 2.64      | 3.2      | 2.48      | 3.4      | 2.81      | 3.2      | 2.77      | 1.61               | 0.15           |
| <b><sup>k</sup>Age</b>                  | 55.4     | 12.4      | 54.8     | 12.3      | 52.7     | 11.7      | 53.7     | 12.7      | 53.7     | 11.6      | 54.3     | 10.7      | 1.18               | 0.32           |
| <b><sup>l</sup>BAI</b>                  | 0.7      | 0.47      | 0.82     | 0.48      | 1.3      | 0.55      | 0.97     | 0.53      | 1.1      | 0.57      | 1.2      | 0.58      | 33.5               | <0.001         |
| <b><sup>m</sup>CIRS Severity Index</b>  | 1.8      | 0.38      | 1.8      | 0.38      | 1.8      | 0.37      | 1.8      | 0.37      | 1.8      | 0.31      | 1.8      | 0.35      | 0.18               | 0.97           |
| <b><sup>n</sup>DSM-5 Mixed Features</b> | 11.7     | 2.76      | 11.4     | 2.45      | 11.6     | 2.57      | 11.8     | 2.69      | 12.1     | 2.64      | 11.8     | 2.56      | 2.13               | 0.06           |

|                                               |      |      |      |      |      |      |      |      |      |      |      |      |      |        |
|-----------------------------------------------|------|------|------|------|------|------|------|------|------|------|------|------|------|--------|
| <b><sup>o</sup>Duration of Index Episode</b>  | 68.3 | 113  | 82.6 | 129  | 102  | 147  | 80.7 | 124  | 120  | 151  | 128  | 169  | 5.66 | <0.001 |
| <b><sup>p</sup>Lifetime Suicidal Ideation</b> | 2.2  | 2.02 | 2.2  | 1.97 | 3.1  | 1.89 | 2.3  | 1.94 | 2.3  | 1.89 | 2.5  | 1.97 | 2.94 | 0.012  |
| <b><sup>q</sup>QIDS-C</b>                     | 14.6 | 2.73 | 15.9 | 2.90 | 20.8 | 2.15 | 16.9 | 2.81 | 18.2 | 2.57 | 20.7 | 2.13 | 130  | <0.001 |
| <b><sup>r</sup>Q-LES-Q-SF</b>                 | 48.6 | 14.2 | 43.5 | 12.8 | 30.2 | 12.9 | 38.1 | 13.2 | 35.5 | 13.8 | 29.4 | 12.8 | 57.7 | <0.001 |

<sup>a</sup>QIDS-C, Quick Inventory of Depressive Symptomatology–Clinician Rated Sleep Cluster. Possible scores are based upon a sum of QIDS-C scores for the following 3 items: mid-nocturnal insomnia, sleep-onset insomnia, and early morning insomnia. Scores range from 0 to 9, with higher scores indicating greater severity of symptoms. Comparisons among six trajectory groups

<sup>b</sup>Education, at baseline. The level of educational attainment by the following categories: high school or less, some college, associate degree, bachelor degree, or higher.

<sup>c</sup>Employment Status, at baseline. The employment status by the following categories: unemployed (includes disability or assistance), retired (and not working), or employed.

<sup>d</sup>Gender. Male or female gender, as declared by the participant.

<sup>e</sup>Grief Endorsement, at baseline. Endorsement of  $\leq 3$  versus  $> 3$  items on the Complicated Grief Questionnaire, with endorsement of more items indicating greater complicated grief.

<sup>f</sup>Marital Status, at baseline. Identification of status as single vs. married/cohabiting.

<sup>g</sup>Race. The declared race of the participant in the following categories: white, African-American/black, or other.

<sup>h</sup>Substance or Alcohol Abuse, at baseline. The presence of a substance or alcohol abuse diagnosis by the M.I.N.I.

<sup>i</sup>Treatment Allocation. Allocation to one of three treatment groups: Aug-ARI, Aug-BUP, or Switch-BUP.

<sup>j</sup>ACES, Adverse Childhood Experiences Survey, at baseline. Possible scores range from 0 to 10, with higher scores indicating greater childhood adversity and greater risk of psychological or health problems.

<sup>k</sup>Age, in years, at baseline.

<sup>l</sup>BAI, Beck Anxiety Inventory, at baseline. Possible scores range from 0 to 3 (average rating of each of the 21 items), with higher scores indicating greater anxiety.

<sup>m</sup>CIRS Severity Index, Cumulative Illness Rating Scale Comorbidity Severity Index, at baseline. Possible scores range from 0 to 4, with higher scores indicating greater severity of co-occurring medical conditions.

<sup>n</sup>DSM-5 Mixed Features, presence of mixed features by a self-rated 9-item mixed features scale based on the DSM-5, at baseline. Possible scores range from 0 to 18, with higher scores indicating more hypomanic or manic symptoms.

<sup>o</sup> Duration of Index Episode, duration in months of the depression episode that is currently being treated, at baseline.

<sup>p</sup>Lifetime Suicidal Ideation, Columbia Suicide Severity Rating Scale-Lifetime Suicidal Ideation, at baseline. Possible scores range from 0 to 5, with higher scores indicating greater suicidal ideation or intent.

<sup>q</sup>QIDS-C, Quick Inventory of Depressive Symptomatology–Clinician Rated, at baseline. The QIDS-C score is calculated from a total of 16 clinician-administered questions, which map onto 9 psychiatric domains: sleep, mood, appetite, concentration, guilt, acute suicidal ideation, interest, fatigue, and psychomotor function. Each domain is scored on a scale of 0 to 3, with a score of 3 indicating greater severity. These scores are then added up to obtain a total QIDS-C score ranging from 0 to 27.

<sup>r</sup>Q-LES-Q-SF, Quality of Life Enjoyment and Satisfaction Questionnaire-Short Form, at baseline. Possible scores range from 0 to 100% of the maximum scale score of 70, with higher scores indicating greater life satisfaction and enjoyment.

**Table 1d. Comparisons of Demographic and Clinical Characteristics of VAST-D Participants by Trajectory Group for the <sup>a</sup>QIDS-C Atypical Cluster**

| Demographic Features                        | Trajectory |      |     |      |     |       |    |      | Chi Square | P value |
|---------------------------------------------|------------|------|-----|------|-----|-------|----|------|------------|---------|
|                                             | 1          |      | 2   |      | 3   |       | 4  |      |            |         |
|                                             | N          | %    | N   | %    | N   | %     | N  | %    |            |         |
| <sup>b</sup> Education                      |            |      |     |      |     |       |    |      | 9.87       | 0.36    |
| Some College                                | 55         | 3.6% | 149 | 9.8% | 324 | 21.3% | 58 | 3.8% |            |         |
| High School or Less Than High School Degree | 46         | 3.0% | 111 | 7.3% | 225 | 14.7% | 47 | 3.1% |            |         |
| Associate degree                            | 30         | 2.0% | 53  | 3.5% | 90  | 5.9%  | 28 | 1.8% |            |         |
| Bachelor's degree or higher                 | 33         | 2.2% | 81  | 5.3% | 157 | 10.3% | 35 | 2.3% |            |         |
| <sup>c</sup> Employment Status              |            |      |     |      |     |       |    |      | 18.5       | 0.01    |
| Employed                                    | 100        | 6.6% | 150 | 9.9% | 99  | 6.5%  | 38 | 2.5% |            |         |
| Retired (and not working)                   | 59         | 3.9% | 108 | 7.1% | 192 | 13%   | 28 | 1.8% |            |         |
| Unemployed (includes those on               | 43         | 2.8% | 125 | 8.2% | 248 | 16.3% | 58 | 3.8% |            |         |

|                                               |     |      |     |       |     |       |     |      |      |        |
|-----------------------------------------------|-----|------|-----|-------|-----|-------|-----|------|------|--------|
| disability or assistance)                     |     |      |     |       |     |       |     |      |      |        |
| <b><sup>d</sup>Gender</b>                     |     |      |     |       |     |       |     |      | 21.1 | <0.001 |
| Male                                          | 123 | 8.1% | 326 | 21.4% | 697 | 45.7% | 150 | 9.9% |      |        |
| Female                                        | 41  | 2.7% | 68  | 4.5%  | 99  | 6.5%  | 18  | 1.2% |      |        |
| <b><sup>e</sup>Grief Endorsement</b>          |     |      |     |       |     |       |     |      | 1.44 | 0.70   |
| <=3                                           | 71  | 4.7% | 168 | 11.0% | 319 | 20.9% | 65  | 4.3% |      |        |
| >3                                            | 93  | 6.1% | 226 | 14.8% | 477 | 31.3% | 103 | 6.8% |      |        |
| <b><sup>f</sup>Marital status</b>             |     |      |     |       |     |       |     |      | 7.8  | 0.05   |
| Single                                        | 97  | 6.4% | 234 | 15.4% | 416 | 27.3% | 85  | 5.6% |      |        |
| Marriage or Cohabitation                      | 67  | 4.4% | 160 | 10.5% | 380 | 24.9% | 83  | 5.5% |      |        |
| <b><sup>g</sup>Race</b>                       |     |      |     |       |     |       |     |      | 9.46 | 0.15   |
| White                                         | 104 | 6.8% | 248 | 16.3% | 541 | 35.5% | 124 | 8.1% |      |        |
| African-America or Black                      | 46  | 3.0% | 105 | 6.9%  | 181 | 12%   | 35  | 2.3% |      |        |
| Other                                         | 14  | 0.9% | 41  | 2.7%  | 74  | 4.9%  | 9   | 0.6% |      |        |
| <b><sup>h</sup>Substance or Alcohol Abuse</b> |     |      |     |       |     |       |     |      | 6.44 | 0.09   |
| No                                            | 142 | 9.3% | 355 | 23.3% | 677 | 44.5% | 149 | 9.8% |      |        |
| Yes                                           | 22  | 1.4% | 39  | 2.6%  | 119 | 7.8%  | 19  | 1.2% |      |        |
| <b><sup>i</sup>Treatment Allocation</b>       |     |      |     |       |     |       |     |      | 9.31 | 0.16   |
| Aug-ARI                                       | 54  | 3.5% | 143 | 9.4%  | 257 | 16.8% | 51  | 3.4% |      |        |



|            |    |      |     |      |     |       |    |      |  |
|------------|----|------|-----|------|-----|-------|----|------|--|
| Aug-BUP    | 61 | 4.0% | 133 | 8.7% | 248 | 16.2% | 64 | 4.2% |  |
| Switch-BUP | 49 | 3.2% | 118 | 7.8% | 291 | 19.1% | 53 | 3.5% |  |

| <b>Clinical Characteristics</b>                | <b>X</b> | <b>SD</b> | <b>X</b> | <b>SD</b> | <b>X</b> | <b>SD</b> | <b>X</b> | <b>SD</b> | <b>F Statistic</b> | <b>P value</b> |
|------------------------------------------------|----------|-----------|----------|-----------|----------|-----------|----------|-----------|--------------------|----------------|
| <sup>j</sup> <b>ACES</b>                       | 3.09     | 2.48      | 3.01     | 2.50      | 3.15     | 2.55      | 3.41     | 2.60      | 0.98               | 0.40           |
| <sup>k</sup> <b>Age</b>                        | 52.6     | 12.0      | 54.1     | 12.3      | 54.5     | 12.3      | 55.8     | 11.7      | 2.03               | 0.11           |
| <sup>l</sup> <b>BAI</b>                        | 0.64     | 0.42      | 0.81     | 0.51      | 0.98     | 0.54      | 1.08     | 0.57      | 28.5               | <0.001         |
| <sup>m</sup> <b>CIRS Severity Index</b>        | 1.79     | 0.36      | 1.83     | 0.39      | 1.84     | 0.37      | 1.81     | 0.35      | 0.99               | 0.40           |
| <sup>n</sup> <b>DSM-5 Mixed Features</b>       | 11.2     | 2.19      | 11.4     | 2.42      | 11.9     | 2.76      | 11.6     | 2.66      | 4.08               | 0.01           |
| <sup>o</sup> <b>Duration of Index Episode</b>  | 72.5     | 106       | 84.5     | 135       | 84.4     | 129       | 120      | 158       | 4.20               | 0.01           |
| <sup>p</sup> <b>Lifetime Suicidal Ideation</b> | 2.09     | 1.97      | 2.10     | 2.03      | 2.26     | 1.94      | 2.98     | 1.86      | 8.64               | <0.001         |
| <sup>q</sup> <b>QIDS-C</b>                     | 14.6     | 2.61      | 16.0     | 2.93      | 17.0     | 3.17      | 19.1     | 3.17      | 70.9               | <0.001         |
| <sup>r</sup> <b>Q-LES-Q-SF</b>                 | 45.8     | 13.0      | 43.1     | 13.9      | 39.4     | 14.5      | 35.5     | 14.6      | 20.4               | <0.001         |

<sup>a</sup>QIDS-C, Quick Inventory of Depressive Symptomatology–Clinician Rated Sleep Cluster. Possible scores are based upon a sum of QIDS-C scores for the following 3 items: mid-nocturnal insomnia, sleep-onset insomnia, and early morning insomnia. Scores range from 0 to 9, with higher scores indicating greater severity of symptoms. Comparisons among six trajectory groups

<sup>b</sup>Education, at baseline. The level of educational attainment by the following categories: high school or less, some college, associate degree, bachelor degree, or higher.

<sup>c</sup>Employment Status, at baseline. The employment status by the following categories: unemployed (includes disability or assistance), retired (and not working), or employed.

<sup>d</sup>Gender. Male or female gender, as declared by the participant.

<sup>e</sup>Grief Endorsement, at baseline. Endorsement of  $\leq 3$  versus  $>3$  items on the Complicated Grief Questionnaire, with endorsement of more items indicating greater complicated grief.

<sup>f</sup>Marital Status, at baseline. Identification of status as single vs. married/cohabiting.

<sup>g</sup>Race. The declared race of the participant in the following categories: white, African-American/black, or other.

<sup>h</sup>Substance or Alcohol Abuse, at baseline. The presence of a substance or alcohol abuse diagnosis by the M.I.N.I.

<sup>i</sup>Treatment Allocation. Allocation to one of three treatment groups: Aug-ARI, Aug-BUP, or Switch-BUP.

<sup>j</sup>ACES, Adverse Childhood Experiences Survey, at baseline. Possible scores range from 0 to 10, with higher scores indicating greater childhood adversity and greater risk of psychological or health problems.

<sup>k</sup>Age, in years, at baseline.

<sup>l</sup>BAI, Beck Anxiety Inventory, at baseline. Possible scores range from 0 to 3 (average rating of each of the 21 items), with higher scores indicating greater anxiety.

<sup>m</sup>CIRS Severity Index, Cumulative Illness Rating Scale Comorbidity Severity Index, at baseline. Possible scores range from 0 to 4, with higher scores indicating greater severity of co-occurring medical conditions.

<sup>n</sup>DSM-5 Mixed Features, presence of mixed features by a self-rated 9-item mixed features scale based on the DSM-5, at baseline. Possible scores range from 0 to 18, with higher scores indicating more hypomanic or manic symptoms.

<sup>o</sup>Duration of Index Episode, duration in months of the depression episode that is currently being treated, at baseline.

<sup>p</sup>Lifetime Suicidal Ideation, Columbia Suicide Severity Rating Scale-Lifetime Suicidal Ideation, at baseline. Possible scores range from 0 to 5, with higher scores indicating greater suicidal ideation or intent.

<sup>q</sup>QIDS-C, Quick Inventory of Depressive Symptomatology–Clinician Rated, at baseline. The QIDS-C score is calculated from a total of 16 clinician-administered questions, which map onto 9 psychiatric domains: sleep, mood, appetite, concentration, guilt, acute suicidal ideation, interest, fatigue, and psychomotor function. Each domain is scored on a scale

of 0 to 3, with a score of 3 indicating greater severity. These scores are then added up to obtain a total QIDS-C score ranging from 0 to 27.

Q-LES-Q-SF, Quality of Life Enjoyment and Satisfaction Questionnaire-Short Form, at baseline. Possible scores range from 0 to 100% of the maximum scale score of 70, with higher scores indicating greater life satisfaction and enjoyment.

**Table 1e. Comparisons of Demographic and Clinical Characteristics of VAST-D Participants by Trajectory Group for the <sup>a</sup>PHQ-9**

| Trajectory                                  |    |      |     |       |     |       |     |      |     |      |    |      |            |         |
|---------------------------------------------|----|------|-----|-------|-----|-------|-----|------|-----|------|----|------|------------|---------|
| Demographic Features                        | 1  |      | 2   |       | 3   |       | 4   |      | 5   |      | 6  |      | Chi Square | P Value |
|                                             | N  | %    | N   | %     | N   | %     | N   | %    | N   | %    | N  | %    |            |         |
| <sup>b</sup> Education                      |    |      |     |       |     |       |     |      |     |      |    |      | 13.1       | 0.59    |
| Some college                                | 38 | 2.5% | 154 | 10.1% | 195 | 12.8% | 47  | 3.1% | 115 | 7.5% | 37 | 2.4% |            |         |
| High school or less than high school degree | 38 | 2.5% | 103 | 6.8%  | 30  | 2.0%  | 136 | 8.9% | 98  | 6.4% | 24 | 1.6% |            |         |
| Associate degree                            | 12 | 0.8% | 57  | 3.7%  | 19  | 1.2%  | 69  | 4.5% | 35  | 2.3% | 9  | 0.6% |            |         |
| Bachelors degree or higher                  | 14 | 0.9% | 74  | 4.9%  | 21  | 1.4%  | 114 | 7.5% | 66  | 4.3% | 17 | 1.1% |            |         |

|                                                         |    |      |     |       |    |      |     |       |     |       |     |       |      |        |
|---------------------------------------------------------|----|------|-----|-------|----|------|-----|-------|-----|-------|-----|-------|------|--------|
| <b><sup>c</sup>Employment Status</b>                    |    |      |     |       |    |      |     |       |     |       |     |       | 23.9 | 0.01   |
| Employed                                                | 28 | 1.8% | 102 | 6.7%  | 25 | 1.6% | 149 | 9.8%  | 64  | 4.2%  | 19  | 1.2%  |      |        |
| Retired (and not working)                               | 33 | 2.2% | 132 | 8.7%  | 32 | 2.1% | 167 | 10.9% | 88  | 5.8%  | 22  | 1.4%  |      |        |
| Unemployed (includes those on disability or assistance) | 40 | 2.6% | 152 | 10.0% | 60 | 3.9% | 196 | 12.9% | 161 | 10.6% | 45  | 3.0%  |      |        |
| <b><sup>d</sup>Gender</b>                               |    |      |     |       |    |      |     |       |     |       |     |       | 24.0 | <0.001 |
| Male                                                    | 87 | 5.7% | 342 | 22.4% | 86 | 5.7% | 423 | 27.8% | 280 | 18.4% | 78  | 5.1%  |      |        |
| Female                                                  | 15 | 1.0% | 46  | 3.0%  | 31 | 2.0% | 91  | 6.0%  | 34  | 2.2%  | 9   | 0.6%  |      |        |
| <b><sup>e</sup>Grief Endorsement</b>                    |    |      |     |       |    |      |     |       |     |       |     |       | 26.9 | <0.001 |
| <=3                                                     | 53 | 3.5% | 150 | 9.9%  | 41 | 2.7% | 243 | 16.0% | 113 | 7.4%  | 23  | 1.5%  |      |        |
| >3                                                      | 49 | 3.2% | 238 | 15.6% | 76 | 5.0% | 271 | 17.8% | 201 | 13.2% | 64  | 4.2%  |      |        |
| <b><sup>f</sup>Marital status</b>                       |    |      |     |       |    |      |     |       |     |       |     |       | 6.7  | 0.24   |
| Single                                                  | 66 | 4.3% | 101 | 6.6%  | 98 | 6.4% | 81  | 5.3%  | 317 | 20.8% | 169 | 11.1% |      |        |

|                                               |    |      |     |       |     |      |     |       |     |       |     |      |      |      |
|-----------------------------------------------|----|------|-----|-------|-----|------|-----|-------|-----|-------|-----|------|------|------|
| Married or Cohabiting                         | 61 | 4.0% | 81  | 5.3%  | 96  | 6.3% | 38  | 2.5%  | 282 | 18.5% | 132 | 8.7% |      |      |
| <b><sup>g</sup>Race</b>                       |    |      |     |       |     |      |     |       |     |       |     |      | 14.8 | 0.14 |
| White                                         | 64 | 4.2% | 254 | 16.7% | 83  | 5.5% | 358 | 23.5% | 206 | 13.5% | 52  | 3.4% |      |      |
| African-America or Black                      | 26 | 1.7% | 102 | 6.7%  | 25  | 1.6% | 122 | 8.0%  | 69  | 4.5%  | 23  | 1.5% |      |      |
| Other                                         | 12 | 0.8% | 32  | 2.1%  | 9   | 0.6% | 34  | 2.2%  | 39  | 2.6%  | 12  | 0.8% |      |      |
| <b><sup>h</sup>Substance or Alcohol Abuse</b> |    |      |     |       |     |      |     |       |     |       |     |      | 4.52 | 0.48 |
| No                                            | 93 | 6.1% | 337 | 22.1% | 100 | 6.6% | 445 | 29.2% | 268 | 17.6% | 80  | 5.3% |      |      |
| Yes                                           | 9  | 0.6% | 51  | 3.4%  | 17  | 1.1% | 69  | 4.5%  | 46  | 3.0%  | 7   | 0.5% |      |      |
| <b><sup>i</sup>Treatment Allocation</b>       |    |      |     |       |     |      |     |       |     |       |     |      | 8.97 | 0.54 |
| Aug-ARI                                       | 31 | 2.0% | 116 | 7.6%  | 44  | 2.9% | 186 | 12.2% | 97  | 6.4%  | 31  | 2.0% |      |      |
| Aug-BUP                                       | 38 | 2.5% | 126 | 8.3%  | 36  | 2.4% | 167 | 11.0% | 108 | 7.1%  | 31  | 2.0% |      |      |
| Switch-BUP                                    | 33 | 2.2% | 146 | 9.6%  | 37  | 2.4% | 161 | 10.6% | 109 | 7.2%  | 25  | 1.6% |      |      |

| <b>Clinical Characteristic</b>                 | <b>X</b> | <b>SD</b> | <b>F Statistic</b> | <b>P Value</b> |
|------------------------------------------------|----------|-----------|----------|-----------|----------|-----------|----------|-----------|----------|-----------|----------|-----------|--------------------|----------------|
| <sup>j</sup> <b>ACES</b>                       | 3.13     | 2.52      | 3.24     | 2.44      | 3.53     | 2.49      | 3.01     | 2.50      | 3.04     | 2.66      | 3.20     | 2.79      | 1.03               | 0.40           |
| <sup>k</sup> <b>Age</b>                        | 55.6     | 12.9      | 54.5     | 12.1      | 55.0     | 12.3      | 52.5     | 12.3      | 53.9     | 12.3      | 53.3     | 10.6      | 1.23               | 0.29           |
| <sup>l</sup> <b>BAI</b>                        | 0.51     | 0.37      | 0.90     | 0.50      | 1.06     | 0.56      | 0.74     | 0.43      | 1.12     | 0.56      | 1.46     | 0.52      | 60.8               | <0.001         |
| <sup>m</sup> <b>CIRS Severity Index</b>        | 1.82     | 0.41      | 1.82     | 0.38      | 1.86     | 0.33      | 1.81     | 0.38      | 1.84     | 0.34      | 1.89     | 0.40      | 1.12               | 0.35           |
| <sup>n</sup> <b>DSM-5 Mixed Features</b>       | 11.7     | 2.75      | 11.8     | 2.52      | 11.2     | 1.96      | 11.4     | 2.56      | 12.0     | 2.91      | 11.8     | 2.65      | 3.15               | 0.01           |
| <sup>o</sup> <b>Duration of Index Episode</b>  | 68.3     | 123       | 86.6     | 127       | 100      | 156       | 74.9     | 119       | 90.6     | 131       | 151      | 181       | 5.61               | <0.001         |
| <sup>p</sup> <b>Lifetime Suicidal Ideation</b> | 1.94     | 1.97      | 2.24     | 1.94      | 2.25     | 2.01      | 2.56     | 2.01      | 2.35     | 1.95      | 2.42     | 1.90      | 1.25               | 0.28           |
| <sup>q</sup> <b>QIDS-C</b>                     | 9.59     | 4.95      | 15.3     | 3.66      | 13.9     | 4.50      | 20.9     | 2.93      | 19.5     | 3.32      | 23.2     | 2.38      | 235                | <0.001         |
| <sup>r</sup> <b>Q-LES-Q-SF</b>                 | 54.5     | 13.0      | 41.2     | 12.2      | 33.4     | 13.0      | 46.1     | 12.6      | 33.4     | 12.5      | 25.3     | 13.4      | 99.0               | <0.001         |

<sup>a</sup>PHQ-9, Patient Health Questionnaire – 9. Each of 9 questions is scored from 0 to 3, with 3 indicating greater severity. Possible scores on the PHQ-9 range from 0 to 27, with higher scores indicating greater degree of depression. Comparisons for six trajectory groups.

- <sup>b</sup>Education, at baseline. The level of educational attainment by the following categories: high school or less, some college, associate degree, bachelor degree, or higher.
- <sup>c</sup>Employment Status, at baseline. The employment status by the following categories: unemployed (includes disability or assistance), retired (and not working), or employed.
- <sup>d</sup>Gender. Male or female gender, as declared by the participant.
- <sup>e</sup>Grief Endorsement, at baseline. Endorsement of  $\leq 3$  versus  $> 3$  items on the Complicated Grief Questionnaire, with endorsement of more items indicating greater complicated grief.
- <sup>f</sup>Marital Status, at baseline. Identification of status as single vs. married/cohabiting.
- <sup>g</sup>Race. The declared race of the participant in the following categories: white, African-American/black, or other.
- <sup>h</sup>Substance or Alcohol Abuse, at baseline. The presence of a substance or alcohol abuse diagnosis by the M.I.N.I.
- <sup>i</sup>Treatment Allocation. Allocation to one of three treatment groups: Aug-ARI, Aug-BUP, or Switch-BUP.
- <sup>j</sup>ACES, Adverse Childhood Experiences Survey, at baseline. Possible scores range from 0 to 10, with higher scores indicating greater childhood adversity and greater risk of psychological or health problems.
- <sup>k</sup>Age, in years, at baseline.
- <sup>l</sup>BAI, Beck Anxiety Inventory, at baseline. Possible scores range from 0 to 3 (average rating of each of the 21 items), with higher scores indicating greater anxiety.
- <sup>m</sup>CIRS Severity Index, Cumulative Illness Rating Scale Comorbidity Severity Index, at baseline. Possible scores range from 0 to 4, with higher scores indicating greater severity of co-occurring medical conditions.
- <sup>n</sup>DSM-5 Mixed Features, presence of mixed features by a self-rated 9-item mixed features scale based on the DSM-5, at baseline. Possible scores range from 0 to 18, with higher scores indicating more hypomanic or manic symptoms.
- <sup>o</sup>Duration of Index Episode, duration in months of the depression episode that is currently being treated, at baseline.
- <sup>p</sup>Lifetime Suicidal Ideation, Columbia Suicide Severity Rating Scale-Lifetime Suicidal Ideation, at baseline. Possible scores range from 0 to 5, with higher scores indicating greater suicidal ideation or intent.
- <sup>q</sup>QIDS-C, Quick Inventory of Depressive Symptomatology–Clinician Rated, at baseline. The QIDS-C score is calculated from a total of 16 clinician-administered questions, which map onto 9 psychiatric domains: sleep, mood, appetite, concentration, guilt, acute suicidal ideation, interest, fatigue, and psychomotor function. Each domain is scored on a scale of 0 to 3, with a score of 3 indicating greater severity. These scores are then added up to obtain a total QIDS-C score ranging from 0 to 27.
- <sup>r</sup>Q-LES-Q-SF, Quality of Life Enjoyment and Satisfaction Questionnaire-Short Form, at baseline. Possible scores range from 0 to 100% of the maximum scale score of 70, with higher scores indicating greater life satisfaction and enjoyment
